# Supplementary material for: Hemagglutinin destabilization in H3N2 vaccine reference viruses skews antigenicity and prevents airborne transmission in ferrets
Source: PubMed Central journal article supplement — Sci Adv. 2023 Mar 29;9(13):eadf5182. doi: 10.1126/sciadv.adf5182 (PMC10058244; doi:10.1126/sciadv.adf5182), 2023-03-29
Supplement: sciadv.adf5182_sm.pdf [file sciadv.adf5182_sm.pdf]

Supplementary Materials for

**Hemagglutinin destabilization in H3N2 vaccine reference viruses skews antigenicity and prevents airborne transmission in ferrets**

Meng Hu *et al.*

Corresponding author: Richard J. Webby, [richard.webby@stjude.org](mailto:richard.webby@stjude.org); Charles J. Russell, [charles.russell@stjude.org](mailto:charles.russell@stjude.org)

*Sci. Adv.* **9**, eadf5182 (2023)  
DOI: 10.1126/sciadv.adf5182

**This PDF file includes:**

Figs. S1 to S9  
Tables S1 to S5

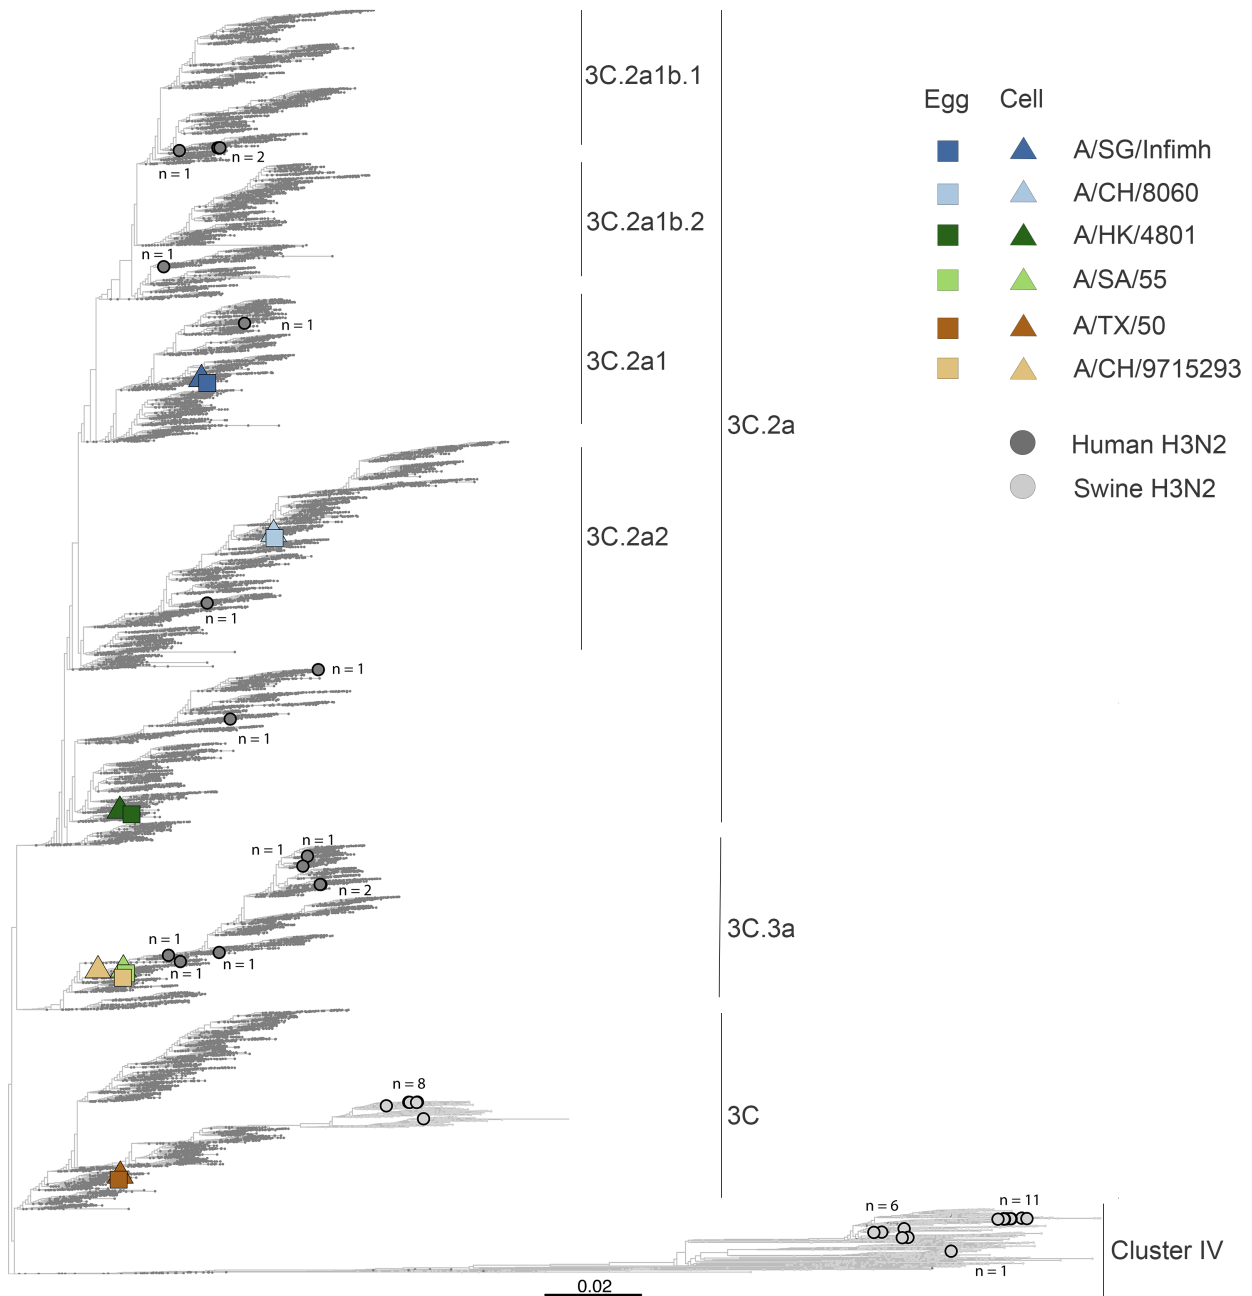

**Fig. S1. Phylogenetic analyses of HA segments of human and swine H3N2 IAVs.** HA gene sequences of viruses used in this study were obtained by whole-genome sequencing. Full-length HA segments of representative human and swine isolates (2012-2019) were retrieved from Global Initiative on Sharing All Influenza Data (GISAID) or in-house sequencing. Human isolates in this study are dark grey circles, and swine isolates in this study are light grey circles. Six recent human vaccine reference viruses (utilized during 2013-2019 influenza vaccine seasons) grown in eggs (squares) and cells (triangles) are identified by colored symbols shown in the legend.

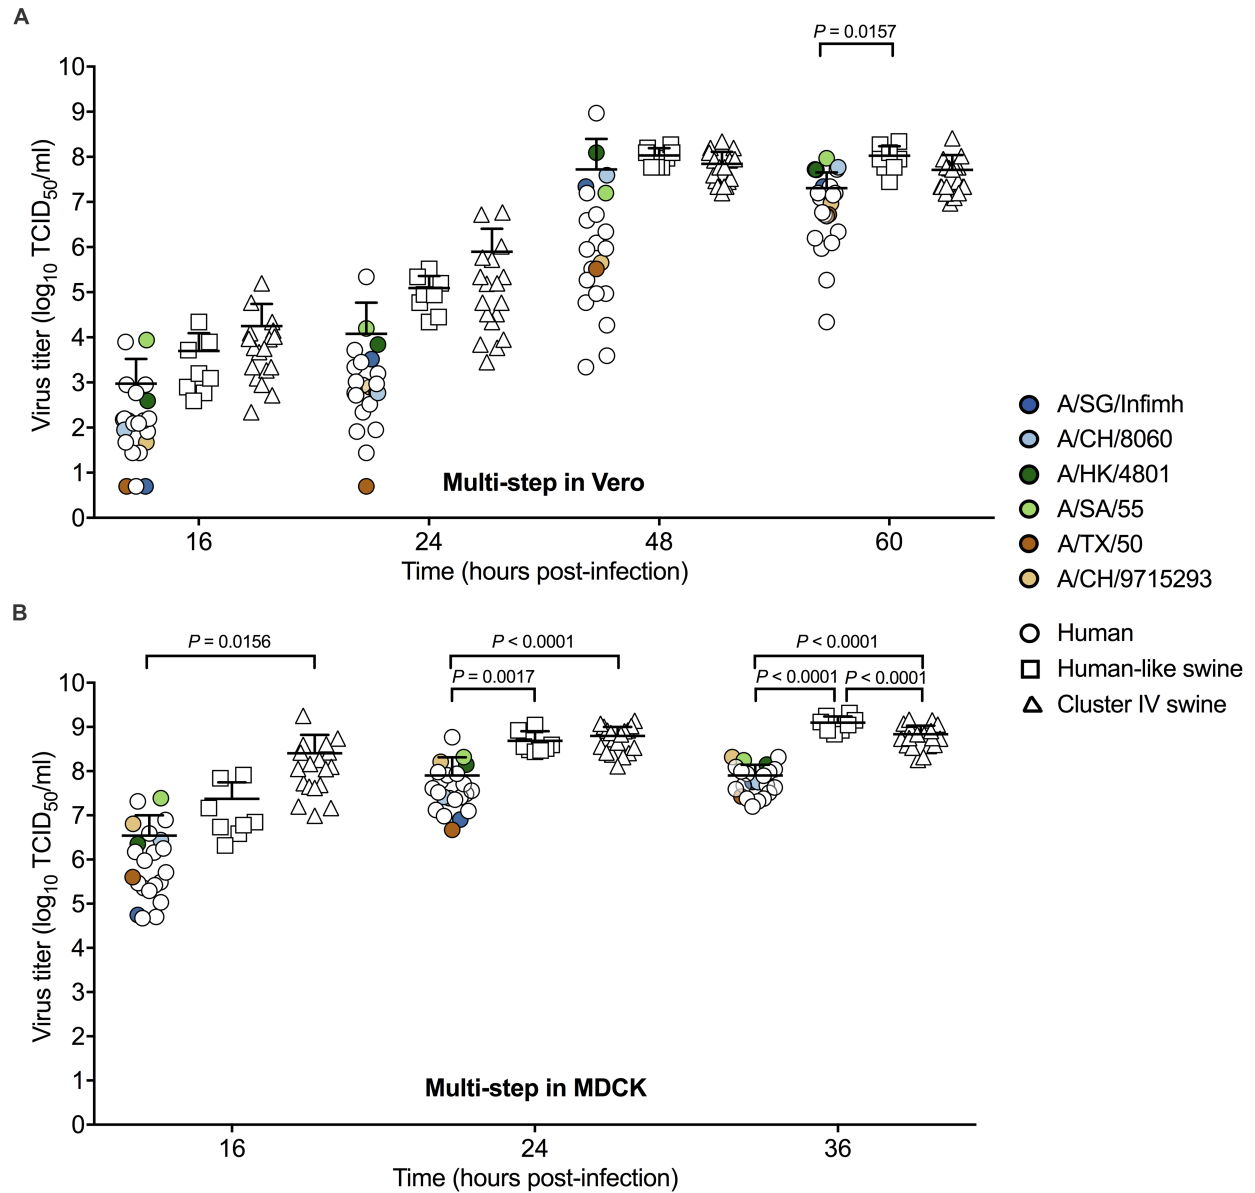

**Fig. S2. Virus replication in Vero and MDCK cells.** (A) Virus multi-step replication in Vero cells (MOI of 0.01 PFU/cell). (B) Virus multi-step replication in MDCK cells (MOI of 0.01 PFU/cell). Virus multi-step replication in Vero and MDCK cells were performed as in Fig. 2. *P* values were determined according to two-way ANOVA followed by Tukey's test.

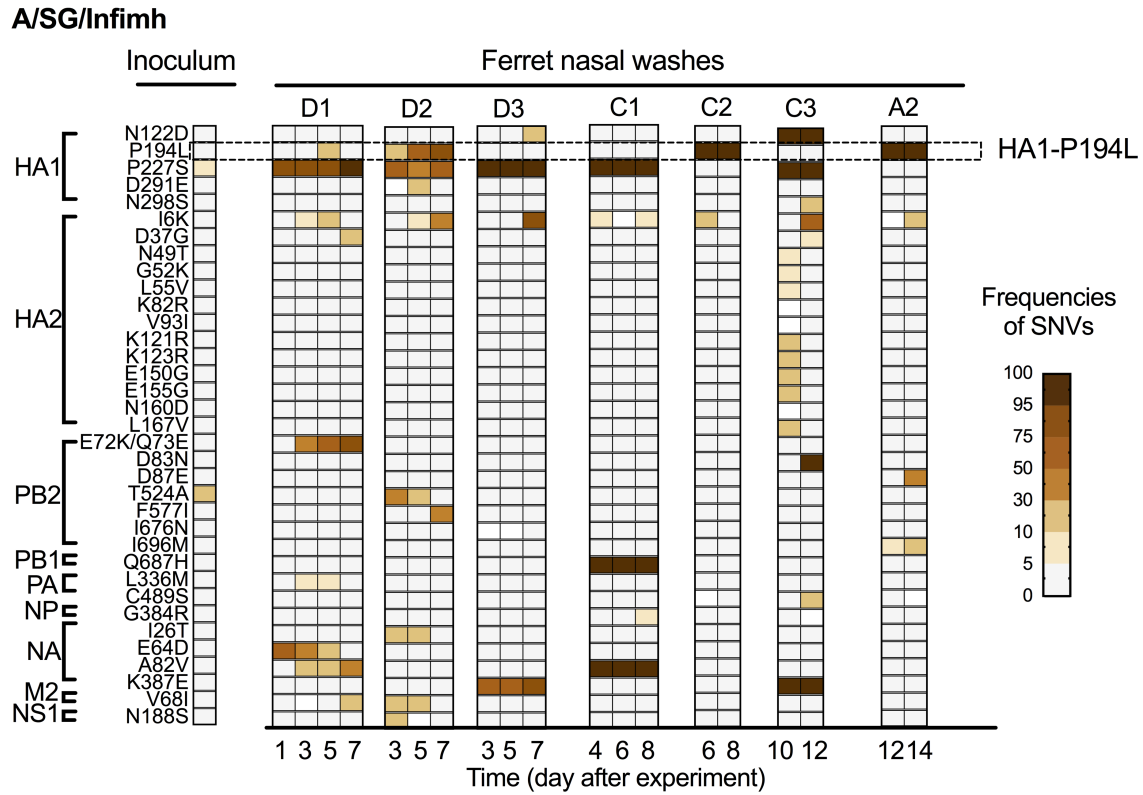

**Fig. S3. Frequencies of genome variants of egg-based vaccine reference virus A/SG/Infimh in ferrets.** The ferret experiment was performed as in Fig. 4. Whole genome sequences of the inoculum and the nasal washes from ferrets were obtained by the next generation sequencing. Each column represents the non-synonymous single nucleotide variants (SNVs) for one ferret nasal wash. SNVs with reads  $\geq 10$  are shown. For HA segment, SNV frequencies greater than 5% is shown. For other segments, SNV frequencies either greater than 50% or detected more than twice in nasal wash samples are shown. The frequencies of SNVs are represented by the colored scale.



**A/HK/4801**

**Trial 1**

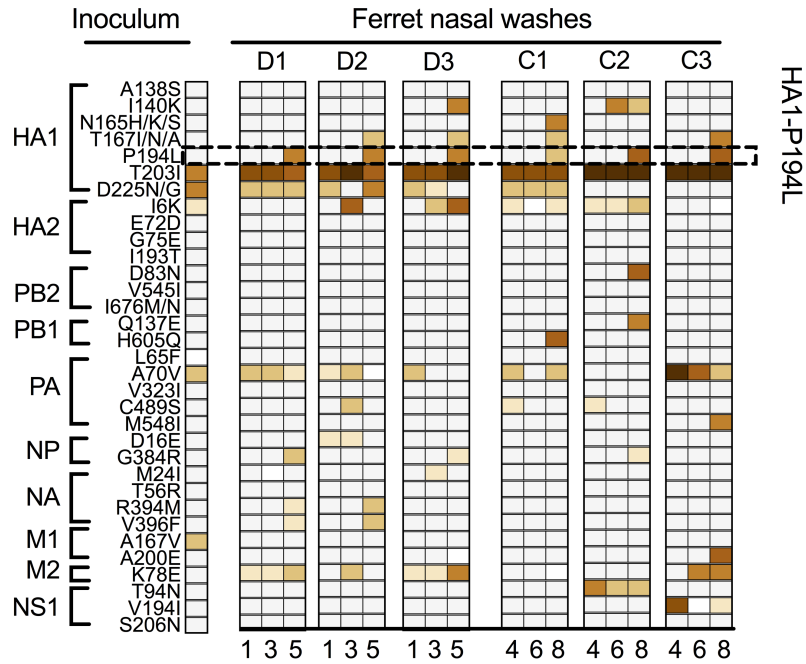

**Trial 2**

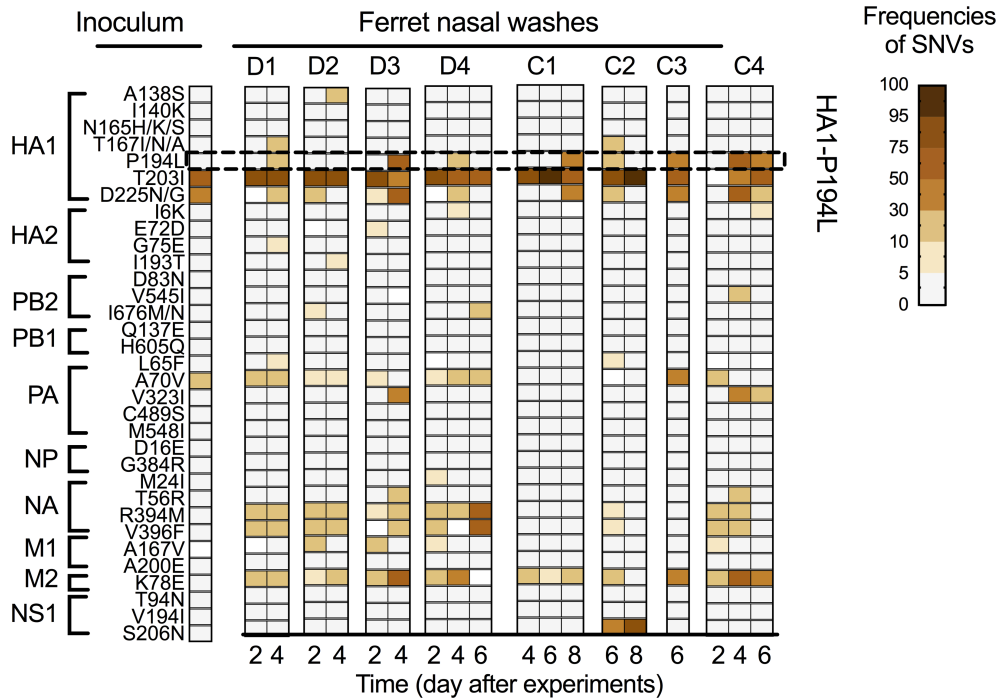

**Fig. S4. Frequencies of genome variants of egg-based vaccine reference virus A/HK/4801 in ferrets.** The ferret transmission experiment was performed as illustrated in Fig. 4. Next generation sequencing and SNV analysis were performed as in fig. S3.

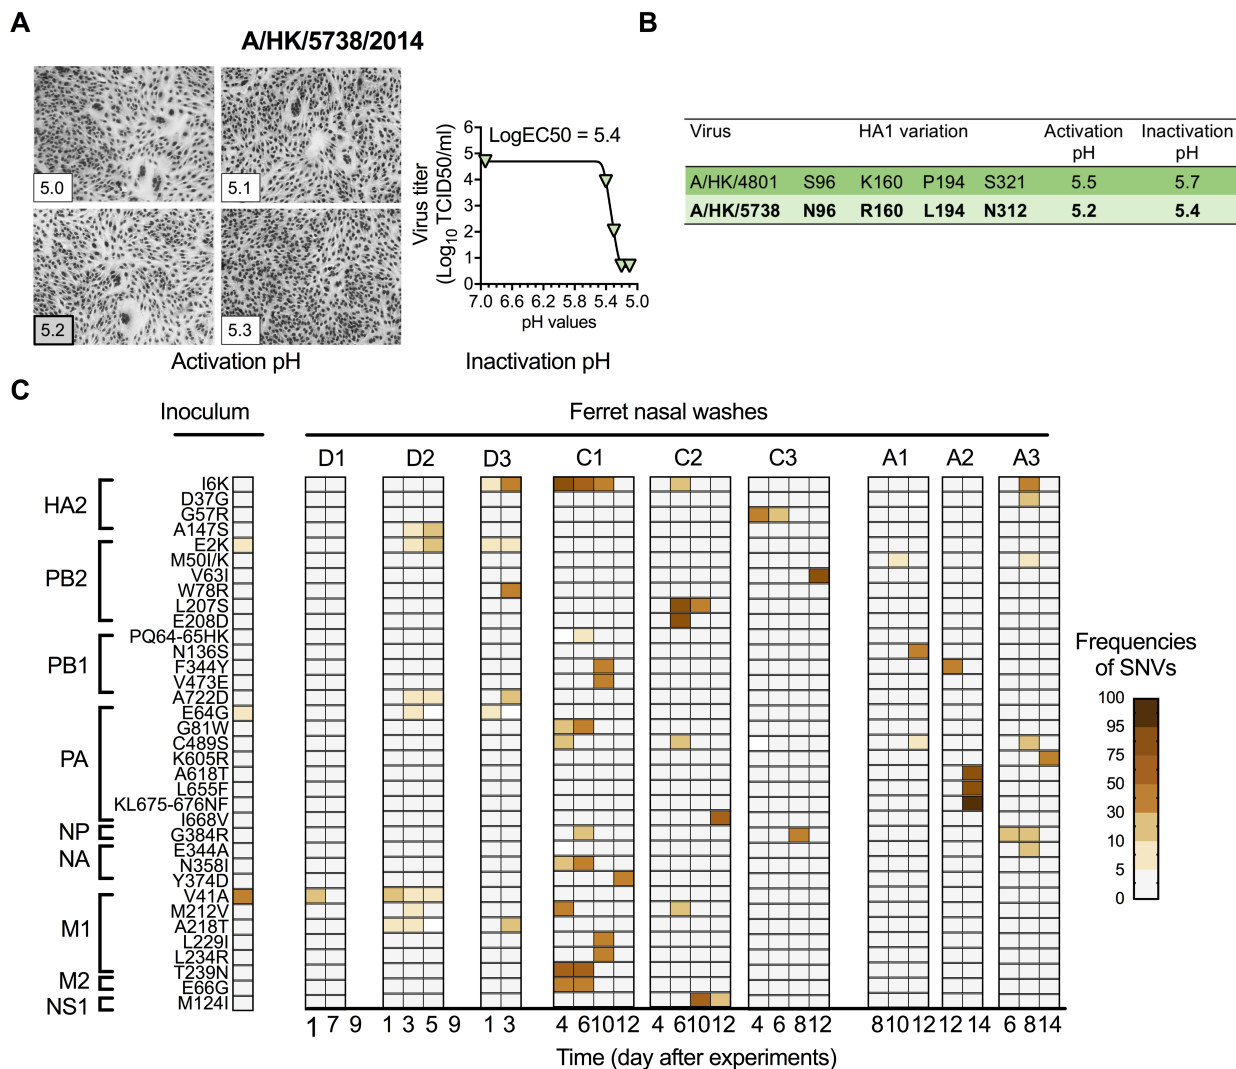

**Fig. S5. Characterization of A/HK/5738 (an A/HK/4801-like virus) containing HA1-L194.** (A) HA activation pH and virus inactivation pH values of the A/HK/5738 isolate. (B) Genotype and phenotype variations between A/HK/4801 and A/HK/5738. (C) Frequencies of genome variants of the A/HK/5738 in ferrets. The ferret transmission experiment was performed as illustrated in Fig. 4. Next generation sequencing and SNV analysis were performed as in fig. S3.

**A/TX/50**

Trial 1 (cells)

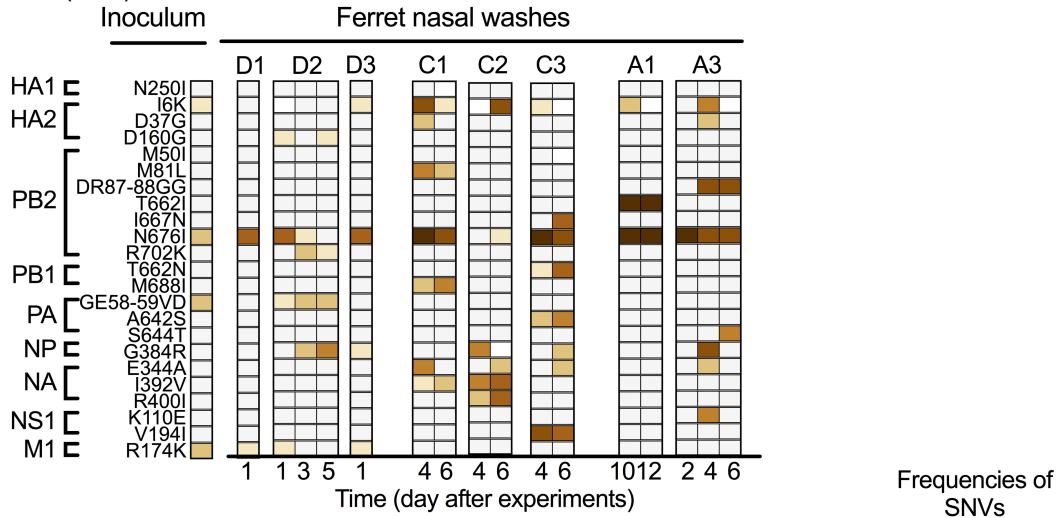

Trial 2 (eggs)

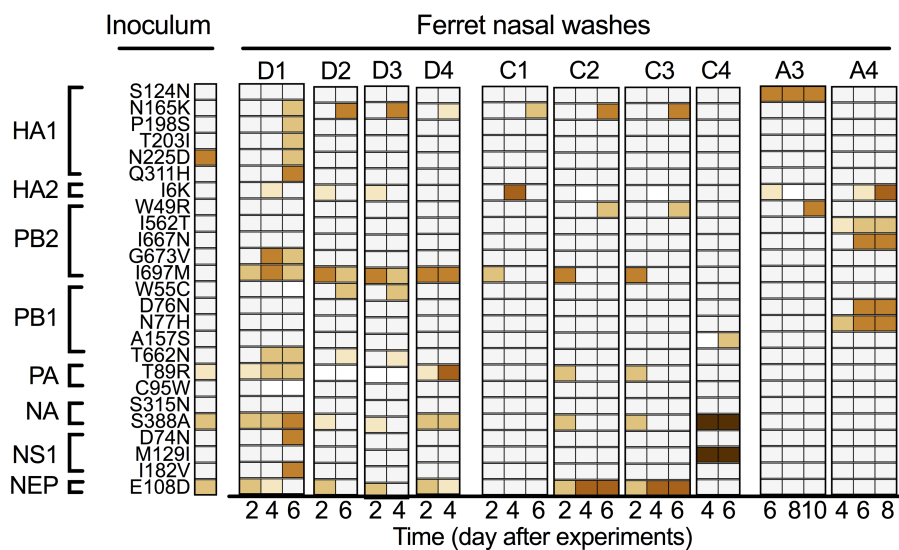

**Fig. S6. Frequencies of genome variants for A/TX/50 with and without the egg adaptive mutation HA1-V186 in ferrets.** The ferret transmission experiment was performed as illustrated in Fig. 4. Next generation sequencing and SNV analysis were performed as in fig. S3.

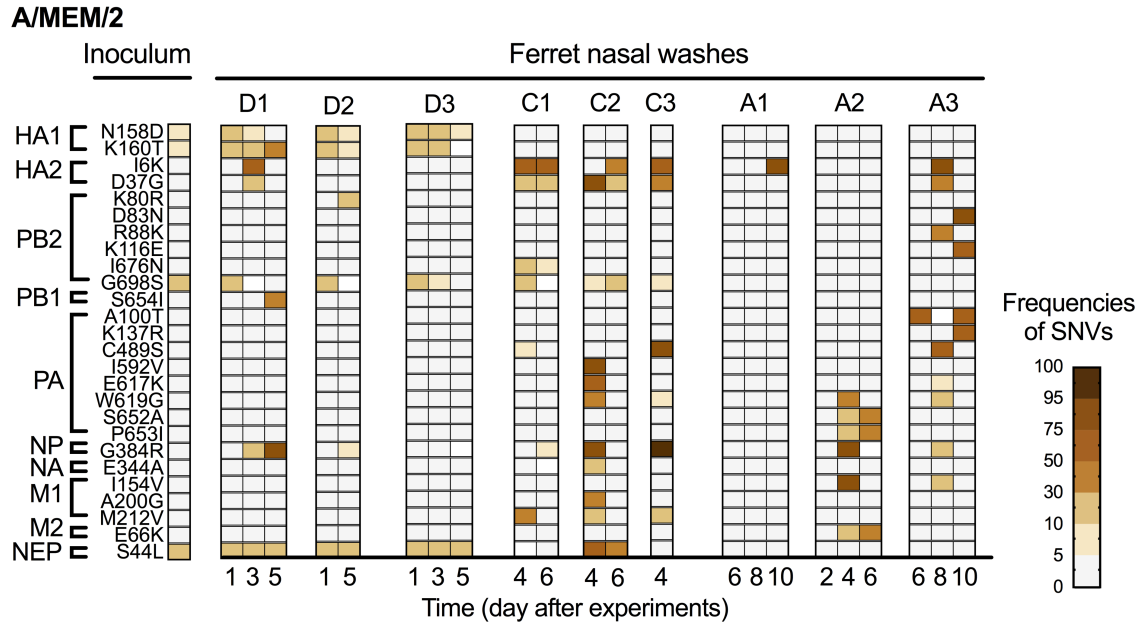

**Fig. S7. Frequencies of genome variants for A/MEM/2 in ferrets.** The ferret transmission experiment was performed as illustrated in Fig. 4. Next generation sequencing and SNV analysis were performed as in fig. S3.

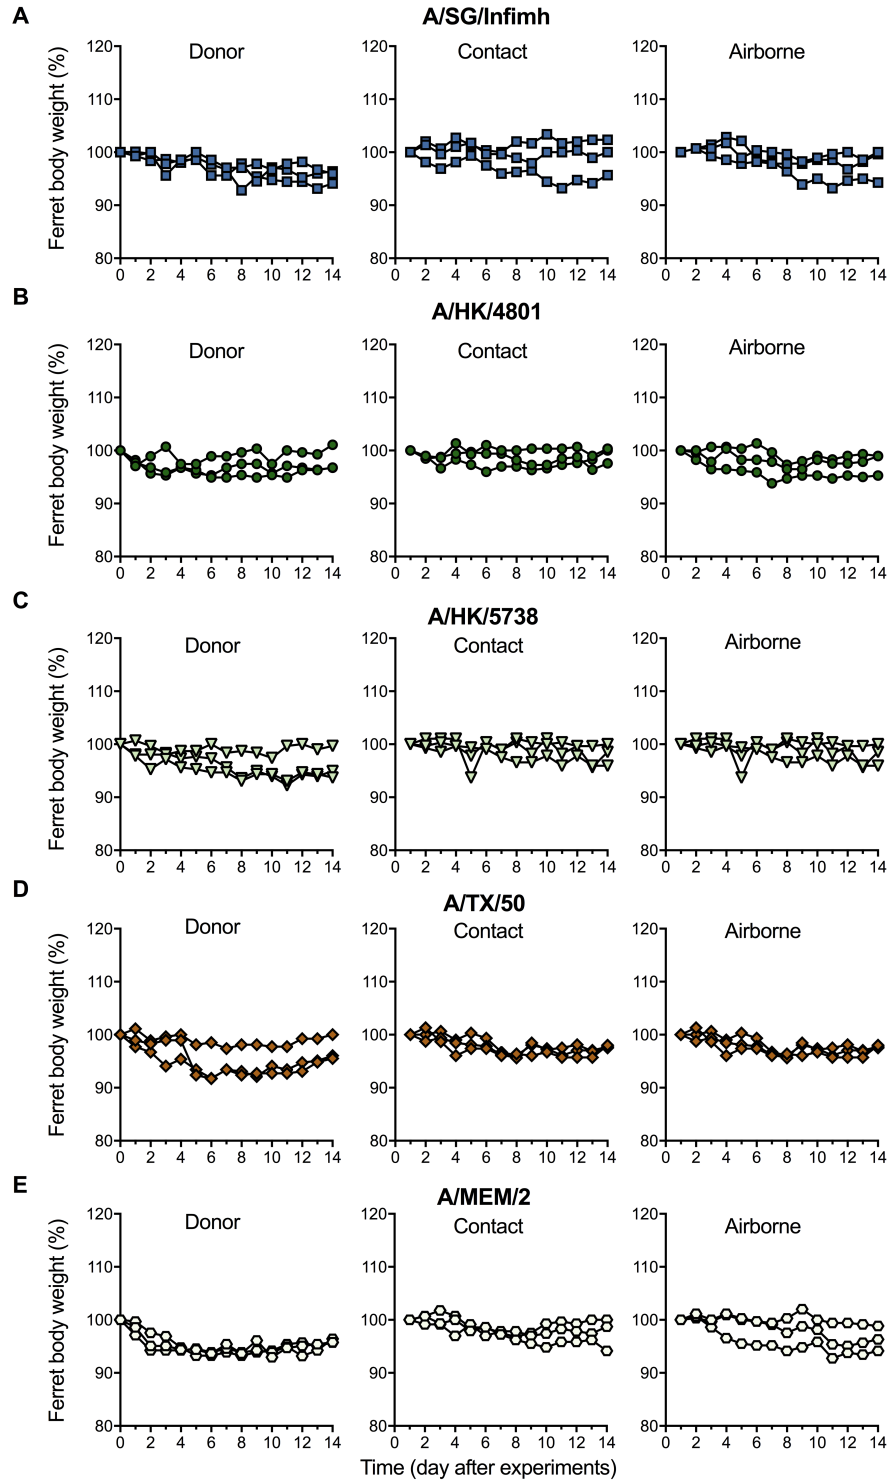

**Fig. S8. Ferret body weights.** Ferret body weights of A/SG/Infimh (A), A/HK/4801 trial 1 (B), A/HK/5738 (C), A/TX/50 trial 1 (D), and A/MEM/2 (E). Body weight was recorded daily.

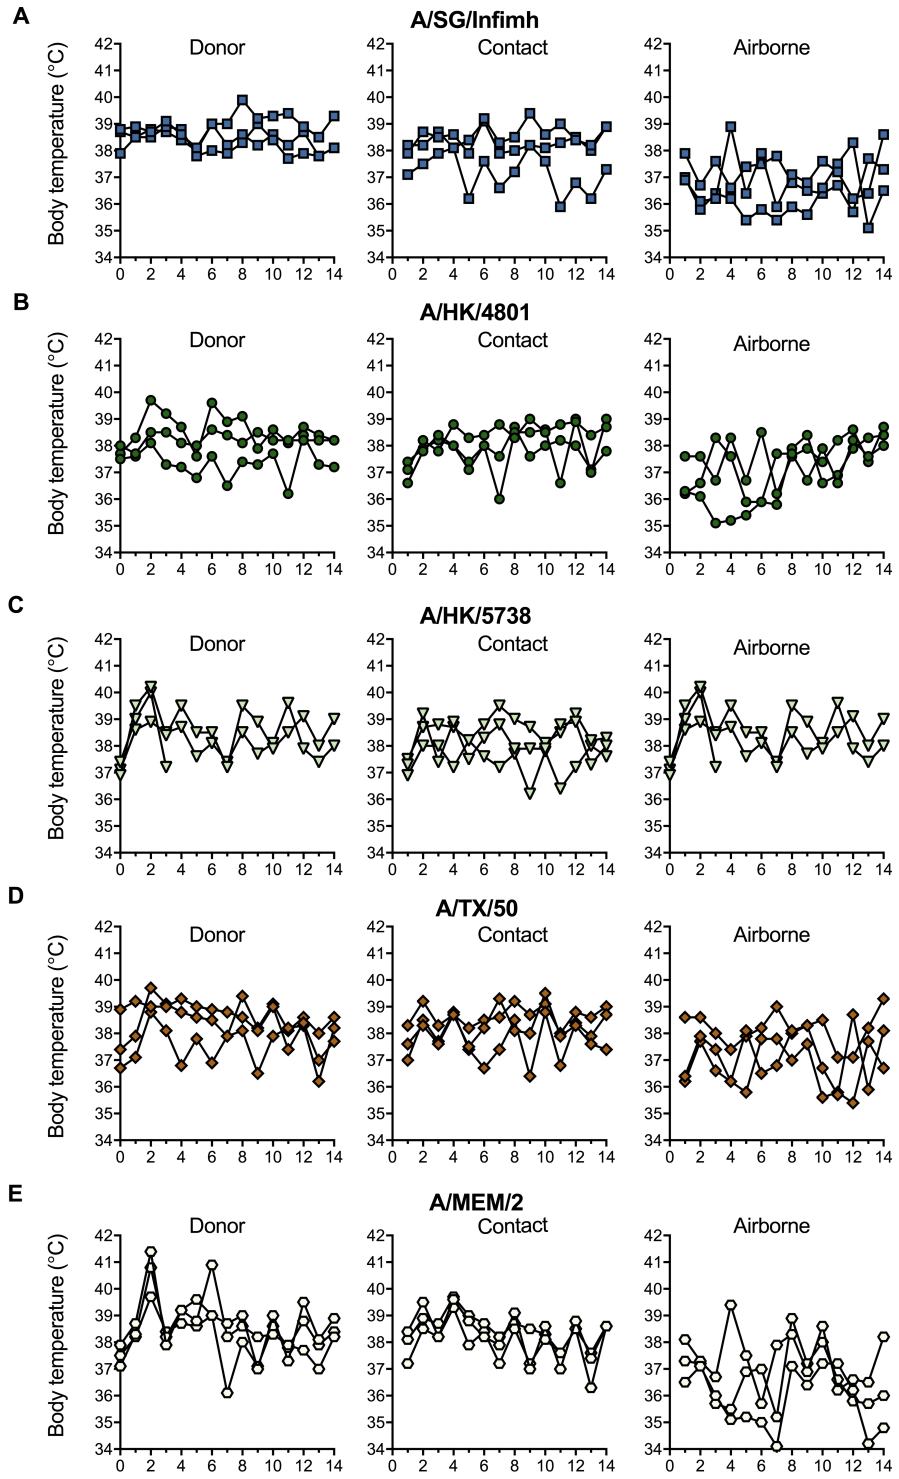

**Fig. S9. Ferret body temperatures.** Ferret body temperatures of A/S/G/Infimh (A), A/HK/4801 trial 1 (B), A/HK/5738 (C), A/TX/50 trial 1 (D), and A/MEM/2 (E). Temperature was recorded daily.

**Table S1. Genome variations for vaccine reference viruses cultured in cells and in eggs.**

| A/Singapore/INFIMH-16-0019/2016 |                      |                  |      |      |                |      |
|---------------------------------|----------------------|------------------|------|------|----------------|------|
| GISAID ID                       | Passage History      | HA1 <sup>b</sup> |      |      | NP             | NS1  |
| EPI_ISL_16706695 <sup>#a</sup>  | E5/E2/E1/C1          | 160K             | 194P | 225G | 311H           | 191T |
| EPI_ISL_1655936                 | E7                   | 160K             | 194P | 225G | X <sup>c</sup> | X    |
| EPI_ISL_344420                  | E5/E1/E1             | 160K             | 194P | 225G | X              | X    |
| EPI_ISL_335174                  | E5/E1                | 160K             | 194P | 225G | X              | X    |
| EPI_ISL_284191                  | E5/E2                | 160K             | 194P | 225G | X              | 191T |
| EPI_ISL_284136                  | E5/E2 CL-2           | 160K             | 194P | X    | 311H           | 191T |
| EPI_ISL_275709                  | E5/E1                | 160K             | 194P | X    | 311Q           | 191T |
| EPI_ISL_257001                  | E5/IR                | 160K             | 194P | X    | 311Q           | 191T |
| EPI_ISL_239803                  | E5                   | 160K             | 194P | X    | 311Q           | 191T |
| EPI_ISL_284191                  | E5/E2                | 160K             | 194P | 225G | X              | 191T |
| EPI_ISL_291274                  | E6                   | 160K             | 194P | X    | X              | 191T |
| EPI_ISL_344419                  | C1/SIAT3/SIAT1/SIAT2 | 160T             | 194L | 225D | X              | X    |
| EPI_ISL_335173                  | C1/SIAT3/SIAT1       | 160T             | 194L | 225D | X              | X    |
| EPI_ISL_330262                  | C1/SIAT3/SIAT4       | 160T             | 194L | 225D | 311Q           | 191T |
| EPI_ISL_311688                  | C1/SIAT3/SIAT3       | 160T             | 194L | 225D | 311Q           | 191T |
| EPI_ISL_296168                  | C1/SIAT3/SIAT1       | 160T             | 194L | 225D | 311Q           | 191T |
| EPI_ISL_285898                  | C1/SIAT3             | 160T             | 194L | 225D | 311Q           | 191T |
| EPI_ISL_285897                  | C1/SIAT3/SIAT2       | 160T             | 194L | 225D | 311Q           | 191I |
| EPI_ISL_225834                  | Clinical specimen    | 160T             | 194L | 225D | X              | X    |
| A/Switzerland/8060/2017         |                      |                  |      |      |                |      |
| GISAID ID                       | Passage History      | HA1              |      |      |                |      |
| EPI_ISL_16706701 <sup>#</sup>   | E7/E1/C1             | 160K             | 194P |      | 203I           |      |
| EPI_ISL_344423                  | E5/E1/E1             | 160K             | 194P |      | 203T           |      |
| EPI_ISL_334556                  | E5/E1                | 160K             | 194P |      | 203T           |      |
| EPI_ISL_331821                  | E5/E2                | 160K             | 194P |      | 203T           |      |
| EPI_ISL_331220                  | E6                   | 160K             | 194P |      | 203T           |      |
| EPI_ISL_330887                  | E5                   | 160K             | 194P |      | 203T           |      |
| EPI_ISL_319720                  | E5/E1                | 160K             | 194P |      | 203T           |      |
| EPI_ISL_303951                  | SIAT1/SIAT1          | 160T             | 194L |      | 203T           |      |
| EPI_ISL_294252                  | SIAT1                | 160T             | 194L |      | 203T           |      |
| EPI_ISL_334555                  | SIAT2/SIAT2          | 160T             | 194L |      | 203T           |      |
| EPI_ISL_332305                  | SIAT2/SIAT1          | 160T             | 194L |      | 203T           |      |
| EPI_ISL_331924                  | SIAT2                | 160T             | 194L |      | 203T           |      |

| A/Hong Kong/4801/2014     |                 |      |      |      |      |      |      |      |      |
|---------------------------|-----------------|------|------|------|------|------|------|------|------|
| GISAID ID                 | Passage History | HA1  |      |      |      |      | NP   |      | NA   |
| EPI_ISL_16706634 #        | E5/E2/E2/E1/C1  | 96S  | 160K | 194P | 203T | 260I | 101G | 454D | 148T |
| EPI_ISL_16713985 #        | E5/E2/E2/E1     | 96S  | 160K | 194P | 203T | 260I | 101G | 454D | 148T |
| EPI_ISL_2443866           | E8              | 96S  | 160K | 194P | 203T | 260I | 101G | 454D | 148T |
| EPI_ISL_270160            | E5/E3           | 96S  | 160K | 194P | X    | 260I | 101G | 454D | 148T |
| EPI_ISL_189814            | E5/E2           | 96S  | 160K | 194P | 203T | 260I | 101G | 454D | 148T |
| EPI_ISL_176512            | E5/E1           | 96S  | 160K | 194P | 203T | 260I | 101G | 454D | 148T |
| EPI_ISL_195755            | E6 (Am1AI)/E1+1 | 96N  | 160K | 194P | 203I | 260L | 101G | 454D | 148T |
| EPI_ISL_215973 * d        | E8              | 96S  | 160K | 194P | 203T | 260I | X    | X    | 148T |
| EPI_ISL_215974 *          | E8              | 96S  | 160K | 194P | X    | 260I | X    | X    | 148T |
| EPI_ISL_165554            | SIAT1           | 96N  | 160T | 194L | 203T | 260I | 101G | 454D | 148T |
| EPI_ISL_233740            | C4/S4           | 96N  | 160T | 194L | 203T | 260I | 101D | 454E | 148K |
| EPI_ISL_202569            | C4/S3           | 96N  | 160T | 194L | 203T | 260I | 101D | 454E | 148K |
| EPI_ISL_198222            | C4/S2           | 96N  | 160T | 194L | 203T | 260I | 101D | 454E | X    |
| A/South Australia/55/2014 |                 |      |      |      |      |      |      |      |      |
| GISAID ID                 | Passage History | PA   |      | HA1  |      |      |      | NP   |      |
| EPI_ISL_16706071 #        | E5/E2/E1/C1     | V62  | I669 | N145 | H156 | V186 | G225 | N34  |      |
| EPI_ISL_166891            | E5/E1           | V62  | I669 | N145 | H156 | X    | G225 | D34  |      |
| EPI_ISL_166890            | E5/E2           | V62  | I669 | N145 | H156 | V186 | G225 | D34  |      |
| EPI_ISL_166745            | E5/E1           | X    | X    | N145 | H156 | X    | G225 | X    |      |
| EPI_ISL_166239            | E5              | X    | X    | N145 | H156 | G186 | G225 | X    |      |
| EPI_ISL_165593            | E5              | X    | X    | N145 | H156 | G186 | G225 | X    |      |
| EPI_ISL_207650 *          | E6              | X    | X    | S145 | R156 | E186 | G225 | X    |      |
| EPI_ISL_288203            | C1              | V62  | I669 | S145 | H156 | G186 | D225 | D34  |      |
| EPI_ISL_192859            | C3              | M62  | I669 | S145 | H156 | G186 | D225 | D34  |      |
| EPI_ISL_189817            | C1/SIAT3        | V62  | I669 | S145 | H156 | G186 | D225 | D34  |      |
| EPI_ISL_166892            | C1/SIAT1        | X    | X    | S145 | H156 | G186 | D225 | X    |      |
| EPI_ISL_166846            | C1/SIAT2        | V62  | V669 | S145 | H156 | G186 | D225 | X    |      |
| EPI_ISL_166746            | C1/SIAT1        | X    | X    | S145 | H156 | G186 | D225 | X    |      |
| EPI_ISL_166238            | C1              | X    | X    | S145 | H156 | G186 | D225 | X    |      |
| EPI_ISL_165592            | C1              | X    | X    | S145 | H156 | G186 | D225 | X    |      |
| A/Texas/50/2012           |                 |      |      |      |      |      |      |      |      |
| GISAID ID                 | Passage History | PB2  | HA1  |      |      |      | NP   | NA   | M1   |
| EPI_ISL_16701302 #        | C1/C2/C2        | N676 | K2   | G186 | S219 | I226 | G384 | D304 | R174 |
| EPI_ISL_16713984 #        | E6              | I676 | K2   | V186 | F219 | I226 | R384 | D304 | K174 |



|                  |                |      |    |      |      |      |      |      |      |
|------------------|----------------|------|----|------|------|------|------|------|------|
| EPI_ISL_2454729  | C1/C2/C6/SIAT4 | X    | K2 | G186 | S219 | I226 | X    | N304 | X    |
| EPI_ISL_122006   | C1/C1          | X    | K2 | G186 | S219 | I226 | X    | D304 | K174 |
| EPI_ISL_129858   | C1/C2          | I676 | K2 | G186 | S219 | I226 | G384 | D304 | K174 |
| EPI_ISL_170149   | C1/C1/SIAT1    | I676 | K2 | G186 | S219 | I226 | G384 | D304 | K174 |
| EPI_ISL_166860   | C1/C2/SIAT1    | X    | K2 | G186 | S219 | I226 | X    | D304 | X    |
| EPI_ISL_164401   | C1/C1/SIAT2    | I676 | K2 | G186 | S219 | I226 | G384 | D304 | K174 |
| EPI_ISL_2443864  | E5/E2          | X    | Q2 | V186 | F219 | N226 | X    | D304 | X    |
| EPI_ISL_138980   | E6             | X    | K2 | V186 | F219 | X    | X    | D304 | X    |
| EPI_ISL_132908   | E5/E1          | X    | K2 | V186 | F219 | I226 | X    | D304 | X    |
| EPI_ISL_129744   | E5             | I676 | K2 | V186 | F219 | I226 | X    | D304 | K174 |
| EPI_ISL_127832   | E4             | X    | K2 | V186 | F219 | I226 | X    | D304 | K174 |
| EPI_ISL_215972 * | E9             | X    | K2 | V186 | F219 | N226 | X    | D304 | X    |

**A/Switzerland/9715293/2013**

| <b>GISAID ID</b>   | <b>Passage History</b> | <b>PA</b> | <b>HA1</b> |      |      |
|--------------------|------------------------|-----------|------------|------|------|
| EPI_ISL_16706632 # | E4/E3/E1/C1            | PA-594S   | R140       | V186 | S219 |
| EPI_ISL_166858     | E4/E1                  | X         | R140       | V186 | S219 |
| EPI_ISL_164719     | E4/E1                  | X         | R140       | V186 | S219 |
| EPI_ISL_165829     | E4/E2                  | PA-594S   | R140       | V186 | X    |
| EPI_ISL_169603     | E4/E9/E1               | X         | R140       | V186 | F219 |
| EPI_ISL_207641 *   | E6                     | X         | R140       | V186 | Y219 |
| EPI_ISL_2443865    | E7                     | X         | R140       | V186 | Y219 |
| EPI_ISL_202341     | Clone123 E4            | X         | R140       | V186 | S219 |
| EPI_ISL_166310     | SIAT1/SIAT2/SIAT2      | PA-594S   | I140       | G186 | S219 |
| EPI_ISL_189815     | SIAT1/SIAT2/SIAT3      | PA-594N   | I140       | G186 | S219 |
| EPI_ISL_230377     | SIAT1/SIAT2/SIAT4      | X         | I140       | G186 | S219 |
| EPI_ISL_2454697    | SIAT1/SIAT8            | X         | R140       | G186 | S219 |
| EPI_ISL_166859     | SIAT1/SIAT2/SIAT1      | X         | I140       | G186 | S219 |
| EPI_ISL_162149     | SIAT2                  | X         | I140       | G186 | S219 |

<sup>a</sup> #, wild type vaccine reference virus was obtained from the St. Jude Children's Research Hospital Center of Excellence for Influenza Research and Response (CEIRR), or kindly provided by the World Health Organizations (WHO)' Global Influenza Surveillance and Response System.

<sup>b</sup> H3 numbering.

<sup>c</sup> X, unknown.

<sup>d</sup> \*, reassortant vaccine seed stocks.

**Table S2. Human and swine H3N2 influenza viruses (2012-2019) used *in vitro* experiments.**

| <b>Virus</b>                    | <b>Classification</b> | <b>Passage history</b> | <b>HA activation pH</b> | <b>Virus inactivation pH</b> | <b>GISAID ID</b> |
|---------------------------------|-----------------------|------------------------|-------------------------|------------------------------|------------------|
| A/SWITZERLAND/9715293/2013      | Human                 | E4/E3/E1/C1            | 5.30                    | 5.51                         | EPI_ISL_16706632 |
| A/HONG KONG/4801/2014           | Human                 | E5/E2/E2/E1/C1         | 5.47                    | 5.67                         | EPI_ISL_16706634 |
| A/SOUTH AUSTRALIA/55/2014       | Human                 | E5/E2/E1/C1            | 5.53                    | 5.52                         | EPI_ISL_16706071 |
| A/SINGAPORE/INFIMH-16-0019/2016 | Human                 | E5/E2/E1/C1            | 5.67                    | 5.78                         | EPI_ISL_16706695 |
| A/PERU/4617/2017                | Human                 | CX/C1/C1               | 5.40                    | 5.48                         | EPI_ISL_16706702 |
| A/SWITZERLAND/8060/2017         | Human                 | E7/(Am2A15)/E1/C1      | 5.70                    | 5.65                         | EPI_ISL_16706701 |
| A/MEMPHIS/256/2019              | Human                 | C1/C1                  | 5.40                    | 5.51                         | EPI_ISL_16706703 |
| A/MEMPHIS/16/2019               | Human                 | C1/C1                  | 5.13                    | 5.49                         | EPI_ISL_16706704 |
| A/MEMPHIS/26/2019               | Human                 | C1/C1                  | 5.30                    | 5.41                         | EPI_ISL_16709533 |
| A/MEMPHIS/23/2019               | Human                 | C2/C1                  | 5.40                    | 5.46                         | EPI_ISL_16709534 |
| A/MEMPHIS/33/2019               | Human                 | C1/C1                  | 5.40                    | 5.39                         | EPI_ISL_16709535 |
| A/TX/50/2012                    | Human                 | C1/C2/C2               | 5.27                    | 5.53                         | EPI_ISL_16701302 |
| A/HONG KONG/5738/2014           | Human                 | C1/C2/SIAT2/C2         | 5.23                    | 5.40                         | EPI_ISL_16706696 |
| A/GREECE/35/2017                | Human                 | E8/E1/C1               | 5.23                    | 5.47                         | EPI_ISL_16706697 |
| A/HONG KONG/2277/2017           | Human                 | E6/E1/C1               | 5.23                    | 5.44                         | EPI_ISL_16706698 |
| A/MEMPHIS/23/2018               | Human                 | C1/C1                  | 5.67                    | 5.51                         | EPI_ISL_16706700 |
| A/MEMPHIS/2/2017                | Human                 | C2/C1                  | 5.27                    | 5.31                         | EPI_ISL_16706635 |
| A/MEMPHIS/11/2017               | Human                 | C1/C1                  | 5.47                    | 5.47                         | EPI_ISL_16706636 |
| A/MEMPHIS/19/2017               | Human                 | C1/C1                  | 5.27                    | 5.45                         | EPI_ISL_16706638 |
| A/MEMPHIS/25/2017               | Human                 | C2/C1                  | 5.70                    | 5.50                         | EPI_ISL_16700249 |
| A/HONG KONG/2286/2017           | Human                 | E6/E1/C1               | 5.23                    | 5.48                         | EPI_ISL_16706699 |
| A/MEMPHIS/31/2017               | Human                 | C1/C1                  | 5.40                    | 5.48                         | EPI_ISL_16706639 |
| A/SWINE/OH/16TOSU4783/2016      | Human-like Swine      | C1/C1/C1               | 5.30                    | 5.43                         | EPI_ISL_16706692 |
| A/SWINE/OH/17TOSU1389/2017      | Human-like Swine      | X <sup>a</sup> /C1     | 5.27                    | 5.33                         | EPI_ISL_16706693 |
| A/SWINE/IL/TM1705DTW1/2017      | Human-like Swine      | C1/C1                  | 5.37                    | 5.41                         | EPI_ISL_16706640 |
| A/SWINE/IL/TM1705DTW24/2017     | Human-like Swine      | C1/C1                  | 5.40                    | 5.44                         | EPI_ISL_16706641 |
| A/SWINE/IL/TM1706DTW24/2017     | Human-like Swine      | C1/C1                  | 5.33                    | 5.47                         | EPI_ISL_16706642 |
| A/SWINE/IL/TM1707DTW28/2017     | Human-like Swine      | C1/C1                  | 5.27                    | 5.48                         | EPI_ISL_16706643 |
| A/SWINE/IL/TM1708DTW24/2017     | Human-like Swine      | C1/C1                  | 5.30                    | 5.49                         | EPI_ISL_16706666 |
| A/SWINE/IL/TM1709DTW11/2017     | Human-like Swine      | C1/C1                  | 5.30                    | 5.38                         | EPI_ISL_16706694 |
| A/SWINE/OH/12TOSU447/2012       | Cluster IV Swine      | X/C1                   | 5.80                    | 5.81                         | EPI_ISL_16706161 |
| A/SWINE/OH/12TOSU527/2012       | Cluster IV Swine      | X/C1                   | 5.57                    | 5.52                         | EPI_ISL_16706690 |
| A/SWINE/NE/4C-0813-G20/2013     | Cluster IV Swine      | C1/C1                  | 5.87                    | 5.74                         | EPI_ISL_16700814 |
| A/SWINE/NE/4B-1113-P1/2013      | Cluster IV Swine      | C1/C1                  | 5.70                    | 5.69                         | EPI_ISL_16701460 |
| A/SWINE/NE/4B-1113-P15/2013     | Cluster IV Swine      | C1/C1                  | 5.87                    | 5.79                         | EPI_ISL_16701536 |

|                             |                  |          |      |      |                  |
|-----------------------------|------------------|----------|------|------|------------------|
| A/SWINE/NE/4B-1113-P20/2013 | Cluster IV Swine | C1/C1    | 5.90 | 5.88 | EPI_ISL_16702403 |
| A/SWINE/NE/4F-1113-P5/2013  | Cluster IV Swine | C1/C1    | 5.80 | 5.85 | EPI_ISL_16702404 |
| A/SWINE/OH/13TOSU2194/2013  | Cluster IV Swine | C1/C1/C1 | 5.37 | 5.45 | EPI_ISL_16706630 |
| A/SWINE/OH/13TOSU1238/2013  | Cluster IV Swine | X/C1     | 5.87 | 5.68 | EPI_ISL_16706165 |
| A/SWINE/IN/14TOSU0364/2014  | Cluster IV Swine | X/C1     | 5.70 | 5.75 | EPI_ISL_16706691 |
| A/SWINE/NE/4D-0114-P1/2014  | Cluster IV Swine | C1/C1    | 5.87 | 5.71 | EPI_ISL_16702842 |
| A/SWINE/NE/4D-0114-P4/2014  | Cluster IV Swine | C1/C1    | 5.87 | 5.85 | EPI_ISL_16702922 |
| A/SWINE/NE/4D-0114-P8/2014  | Cluster IV Swine | C1/C1    | 5.90 | 5.93 | EPI_ISL_16703274 |
| A/SWINE/NE/4D-0114-P29/2014 | Cluster IV Swine | C1/C1    | 5.87 | 5.88 | EPI_ISL_16705252 |
| A/SWINE/NE/4B-0114-P25/2014 | Cluster IV Swine | C1/C1    | 5.80 | 5.77 | EPI_ISL_16705321 |
| A/SWINE/NE/4G-0314-P10/2014 | Cluster IV Swine | C1/C1    | 5.80 | 5.83 | EPI_ISL_16705322 |
| A/SWINE/IL/1A-0314-G5/2014  | Cluster IV Swine | C1/C1    | 5.57 | 5.57 | EPI_ISL_16705685 |
| A/SWINE/IL/1B-0614-P23/2014 | Cluster IV Swine | C1/C1    | 5.50 | 5.53 | EPI_ISL_16705686 |

<sup>a</sup> X, unknown.

**Table S3. Binding of influenza viruses to regular and modified red blood cells (RBCs) from guinea pigs and turkeys.**

| Virus                         | HA titer (HAU/50 $\mu$ l) |                      |                                   |                                   |
|-------------------------------|---------------------------|----------------------|-----------------------------------|-----------------------------------|
|                               | Guinea pig RBC<br>(0.6%)  | Turkey<br>RBC (0.5%) | $\alpha$ 2,6-Turkey RBC<br>(0.5%) | $\alpha$ 2,3-Turkey<br>RBC (0.5%) |
| A/SG/Infimh (HA1-P194)        | 64                        | 16                   | 32                                | 16                                |
| A/SG/Infimh (HA1-L194)        | 64                        | 16                   | 32                                | 0                                 |
| A/TX/50 (HA1-G186)            | 128                       | 32                   | 64                                | 0                                 |
| A/TX/50 (HA1-V186)            | 128                       | 32                   | 64                                | 0                                 |
| Pandemic H1N1 <sup>a</sup>    | 64                        | 64                   | 64                                | 0                                 |
| Recombinant H5N1 <sup>b</sup> | 64                        | 64                   | <2                                | 64                                |

<sup>a</sup> Pandemic H1N1 refers to A/TN/1-560/2009 (H1N1).

<sup>b</sup> Recombinant H5N1 refers to recombinant A/PR/08/1934 virus bearing the HA gene from A/mallard/Alberta/383/2009 (H5N1).

**Table S4. Comparison of A/HK/4801 and A/HK/5738 isolates.**

| Virus                 |                  | A/HK/4801      | A/HK/5738      |
|-----------------------|------------------|----------------|----------------|
| Passage history       |                  | E5/E2/E2/E1/C1 | C1/C2/SIAT2/C2 |
| HA activation pH      |                  | 5.5            | 5.2            |
| Virus inactivation pH |                  | 5.7            | 5.4            |
| Genome variations     | HA1 <sup>a</sup> | S96            | N96            |
|                       |                  | K160           | R160           |
|                       |                  | P194           | L194           |
|                       |                  | S312           | N312           |
|                       | PB2              | D408           | G408           |
|                       | PB1              | T152           | S152           |
|                       |                  | Y166           | F166           |
|                       |                  | 101G           | 101D           |
|                       | NP               | D454           | E454           |
|                       |                  | D480           | N480           |
|                       |                  | T95            | K95            |
|                       | NA               | I231           | V231           |

<sup>a</sup> H3 numbering.

**Table S5. Data for virus growth based on HA activation pH and virus inactivation pH in ferrets.**

| Virus <sup>a</sup>                                                       |                  | A/SG<br>/Infimh | A/HK/4801 | A/TX/50/2012 | A/HK<br>/5738 | A/MEM<br>/2 |      |      |
|--------------------------------------------------------------------------|------------------|-----------------|-----------|--------------|---------------|-------------|------|------|
| HA stability (pH)                                                        | Activation       | 5.67            | 5.47      | 5.48         | 5.27          | 5.30        | 5.23 | 5.27 |
|                                                                          | Inactivation     | 5.78            | 5.67      | 5.69         | 5.53          | 5.50        | 5.40 | 5.31 |
| Virus replication in<br>Donor (log <sub>10</sub> TCID <sub>50</sub> /ml) | Initial titer    | 2.20            | 3.88      | 3.13         | 5.67          | 4.75        | 4.76 | 6.02 |
|                                                                          | AUC <sup>b</sup> | 5.96            | 5.47      | 4.91         | 5.38          | 5.05        | 6.24 | 5.75 |

<sup>a</sup> The values for HA activation pH, virus inactivation pH, and virus replication in Donor were the mean values for an individual isolate.

<sup>b</sup> AUC, area under shedding curves. The values were calculated by using GraphPad Prism version 7 software.
